# Supplementary material for: Expression of Rab Prenylation Pathway Genes and Relation to Disease Progression in Choroideremia
Source: PubMed Central journal article supplement — Transl Vis Sci Technol. 2021 Jul 13;10(8):12. doi: 10.1167/tvst.10.8.12 (PMC8287038; doi:10.1167/tvst.10.8.12), 2021-07-13
Supplement: tvst-10-8-12_s001.pdf [file tvst-10-8-12_s001.pdf]

## Supplementary Materials

| Gel Lane | Study number | <i>CHM</i> variant                  | Predicted protein consequence                                 | Predicted non-sense decay | Age at baseline | Half-Life (yr) | Standard deviations from mean half-life | Progression rate |
|----------|--------------|-------------------------------------|---------------------------------------------------------------|---------------------------|-----------------|----------------|-----------------------------------------|------------------|
| 1        | PDRD011      | non-contiguous dup exons 1-2 & 9-12 | Two predicted RNA transcripts: r.[1511_*3450del; 117_1166del] | No                        | 42              | N/A            | N/A                                     | N/A              |
| 2        | PDRD005      | c.117_314del                        | R40_S105del                                                   | No                        | 30              | 3.36           | -1.10                                   | Faster           |
| 3        | PDRD014      | c.179delA                           | K60Rfs*10                                                     | Yes                       | 21              | 7.60           | 0.74                                    | Slower           |
| 4        | PDRD030      | c.282delT                           | I95Ffs*31                                                     | Yes                       | 17              | 3.52           | -1.03                                   | Faster           |
| 5        | PDRD028      | c.406_407insT                       | S136Ffs*9                                                     | Yes                       | N/A             | N/A            | N/A                                     | N/A              |
| 6        | PDRD022      | c.492_493delGA                      | N165Cfs*8                                                     | Yes                       | 22              | 7.49           | 0.69                                    | Slower           |
| 7        | PDRD012      | c.655C>T                            | Q219X                                                         | Yes                       | 45              | 3.54           | -1.02                                   | Faster           |
| 8        | PDRD013      | c.757C>T                            | R253X                                                         | Yes                       | 53              | 3.74           | -0.94                                   | Faster           |
| 9        | PDRD018      | c.799C>T                            | R267X                                                         | Yes                       | 53              | 4.21           | -0.73                                   | Faster           |
| 10       | PDRD023      | c.877C>T                            | R293X                                                         | Yes                       | 38              | 3.94           | -0.85                                   | Faster           |
| 11       | PDRD031      | c.940+3delA                         | Splice donor site mutation – Intron 7 (+3)                    | No                        | 36              | 14.07          | 3.54                                    | Slower           |
| 12       | PDRD029      | c.941-2A>G                          | Splice acceptor site mutation – Intron 8 (-2)                 | Yes                       | 33              | 3.46           | -1.06                                   | Faster           |
| 13       | PDRD024      | c.1083_1084insT                     | L362Sfs*56                                                    | Yes                       | 47              | 6.01           | 0.05                                    | Average          |
| 14       | PDRD027      | c.1099_1100ins TACC                 | R367Lfs*52                                                    | Yes                       | 25              | 9.54           | 1.58                                    | Slower           |
| 15       | PDRD026      | c.1780delC                          | L594Ffs*55                                                    | Yes                       | 16              | 4.69           | -0.52                                   | Faster           |

**Supplementary Table 1 | Patients included in molecular studies.** Patients with choroideremia from which analyses on donated fibroblast samples were conducted. Patients are listed order of loading in gel lanes in Figure 4A from left to right. Half-life of autofluorescence area shrinkage as calculated in Fig 1 is listed together with the standard deviations of the half-life from the cohort mean (SD) ( $5.86 \pm 2.31$ ). For further details regarding the non-contiguous exon duplication mutation in PDRD011, see Edwards et al.<sup>30</sup> Half-life was not calculated for PDRD011 as only two imaging time points were available, and PDRD028 was not included in area analysis due to poor image quality. Although the majority of transcripts for patient PDRD031 are predicted to undergo non-sense mediated decay, this patient has previously been shown to produce a low quantity of wildtype transcript,<sup>7</sup> and was therefore excluded from the analysis of compensatory *CHML* upregulation.

| Gel Lane | Study Number | Gene   |
|----------|--------------|--------|
| 1        | PDRD015      | TOPORS |
| 2        | PDRD016      | CAPN5  |
| 3        | PDRD019      | CEP290 |
| 4        | PDRD004      | RHO    |
| 5        | PDRD006      | TOPORS |
| 6        | PDRD003      | USH2A  |
| 7        | PDRD007      | ABCA4  |
| 8        | PDRD008      | MAK    |
| 9        | PDRD009      | USH2A  |
| 10       | PDRD021      | RPGR   |
| 11       | PDRD025      | CDHR1  |
| 12       | PDRD010      | ABCA4  |
| 13       | PDRD020      | RPGR   |
| 14       | PDRD017      | IMPG2  |

**Supplementary Table 2 | Control patients.** Fibroblast samples used as controls in this study were donated by patients with an inherited retinal degeneration but a normal copy of *CHM*. Patients are listed in order of sample loading in Fig 4B from left to right.

| Gel Lane | Study Number | <i>CHM</i> Variant                                |
|----------|--------------|---------------------------------------------------|
| 1        | PDRD005      | c.117_314del                                      |
| 2        | PDRD011      | Non-contiguous duplication exons 1-2 & exons 9-12 |
| 3        | PDRD012      | c.655C>T                                          |
| 4        | PDRD013      | c.757C>T                                          |
| 5        | PDRD014      | c.179delA                                         |
| 6        | PDRD018      | c.799C>T                                          |
| 7        | PDRD022      | c.492_493delGA                                    |
| 8        | PDRD023      | c.877C>T                                          |
| 9        | PDRD024      | c.1083dupT                                        |
| 10       | PDRD026      | c.1780delC                                        |
| 11       | PDRD027      | c.1099_1100insTACC                                |
| 12       | PDRD028      | c.406_407insT                                     |
| 13       | PDRD029      | c.941-2A>G                                        |
| 14       | PDRD030      | c.282delT                                         |

**Supplementary Table 3 | Patients details from Fig 4C.** Patients included in the western blot for REP2 in Fig 4C, listed order of sample loading from left to right.
